# Supplementary material
Source: PubMed Central journal article supplement (PMC3217401)

**Figure S1. Expression of CCR6 and CCR10 ligands in inflamed epithelia of**

**tonsil, and psoriatic and viral skin lesions and colocalization with pDC**

Immunohistochemical stainings on 6  $\mu\text{m}$  acetone fixed sections of tonsils, psoriatic skin, and biopsies of *verrucae vulgaris* showing CCL20 (A, C, and D) and CCL27 (B, D, and F) (red) in epithelial sites together with CD123<sup>+</sup> pDC (blue) at the magnification x 20. In the insert box, the magnification is x 40 and these stainings are representative of 3 independent patients.

**Figure S2. Analysis of immune cell infiltrate in B16 tumors in WT and**

**CCR6-deficient mice**

(A) Shown are the percentages of CD45<sup>+</sup> cells infiltrating B16 tumors treated with vehicle or aldera cream in B6 mice. Symbols represent individual mice (n = 7-8); bars show mean values. (B) Gating strategy to identify pDC as CD11c<sup>+</sup> CD11b<sup>-</sup> B220<sup>+</sup> BST2<sup>+</sup> among CD45-MACS sorted immune cells from aldera-treated B16 tumors in B6 mice. Percentages of gated populations are indicated. (C) Shown are numbers of CD45<sup>+</sup> and (D) CD11c<sup>+</sup> cells among total viable tumor cells between WT animals and CCR6-deficient animals treated with Aldara (n = 9 animals). Symbols represent individual mice (n = 9); bars show mean values. Statistical significance was obtained with a non-parametric Wilcoxon test.

**Figure S3. Distribution of pDC in lymphoid tissues**

Shown are the percentages (upper panels) and numbers (lower panels) of pDC isolated from the liver, lymph node, spleen, and bone marrow from B6 (white circles) and CCR6-deficient (black circles) mice. Circles represent individual mice (n = 9); bars show mean values. Statistical significance was obtained with a non-parametric Wilcoxon test.

**Figure S4. Time course of CCR6 and CCR10 expression induced on human blood pDC upon IL-3 culture**

CCR6 and CCR10 were measured on freshly isolated blood pDC and after 16 h, 24 h, 48 h, and 96 h of culture in the presence of IL-3. The percentage of the positive cell populations is indicated. Data are representative of 3 independent experiments.

**Figure S5. Time course of CCR7 and CCR10 expression and responsiveness induced on human blood pDC upon IL-3±CpG-B culture**

(A) CCR7 and CCR10 expression and (B) migratory capacities to CCL19 and CCL28 (1 µg/ml) were measured on freshly isolated, IL-3, and IL-3+CpG-B-treated blood pDC at various times after culture by flow cytometry and transwell assay respectively. Percentages of positive cells are indicated in each dot plot (data are representative of 3 independent experiments) and pDC migration is depicted as migration index (mean ± SD for 6 to 10 independent experiments).

**Figure S1**

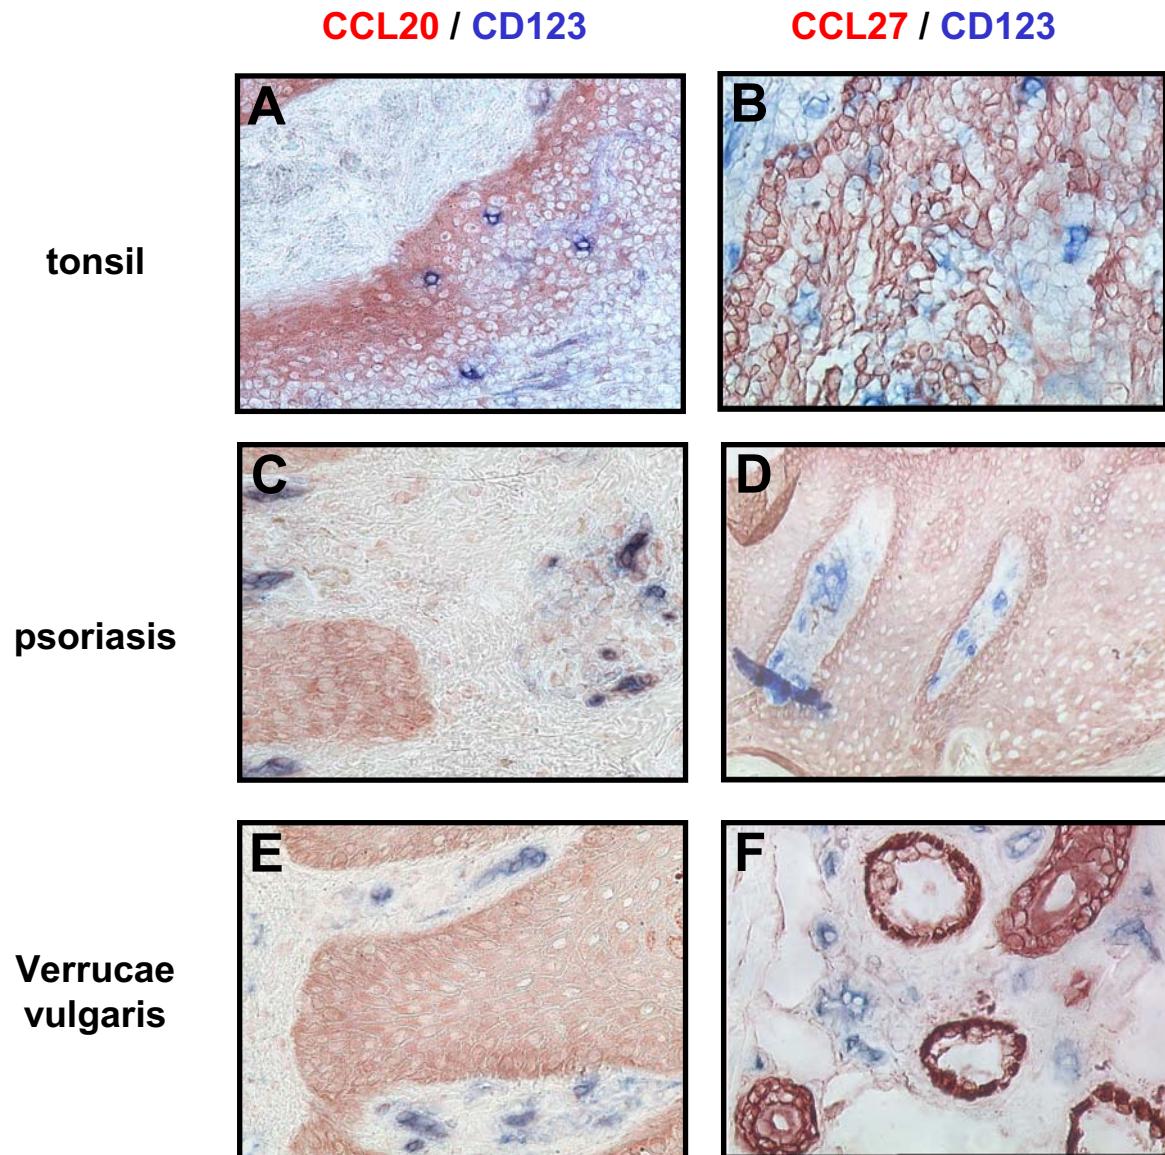

**Figure S2**

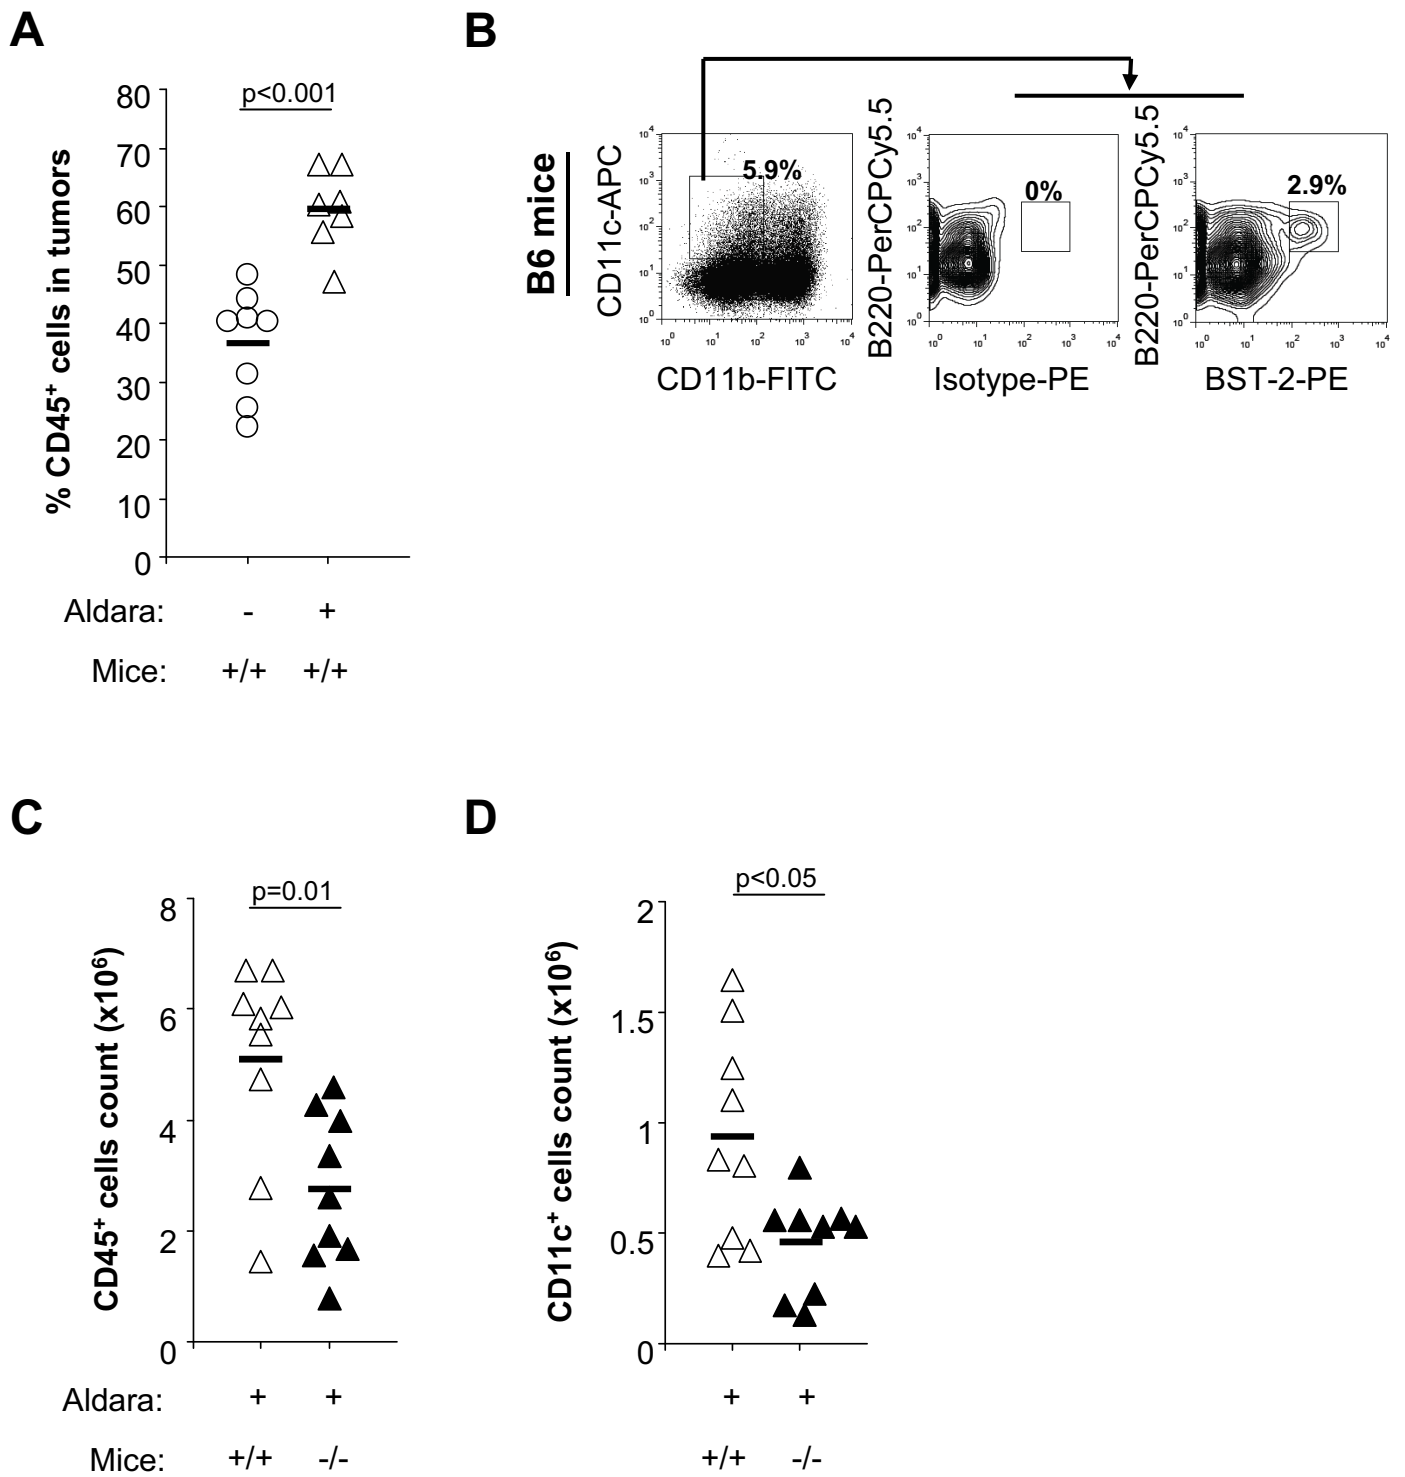

# Figure S3

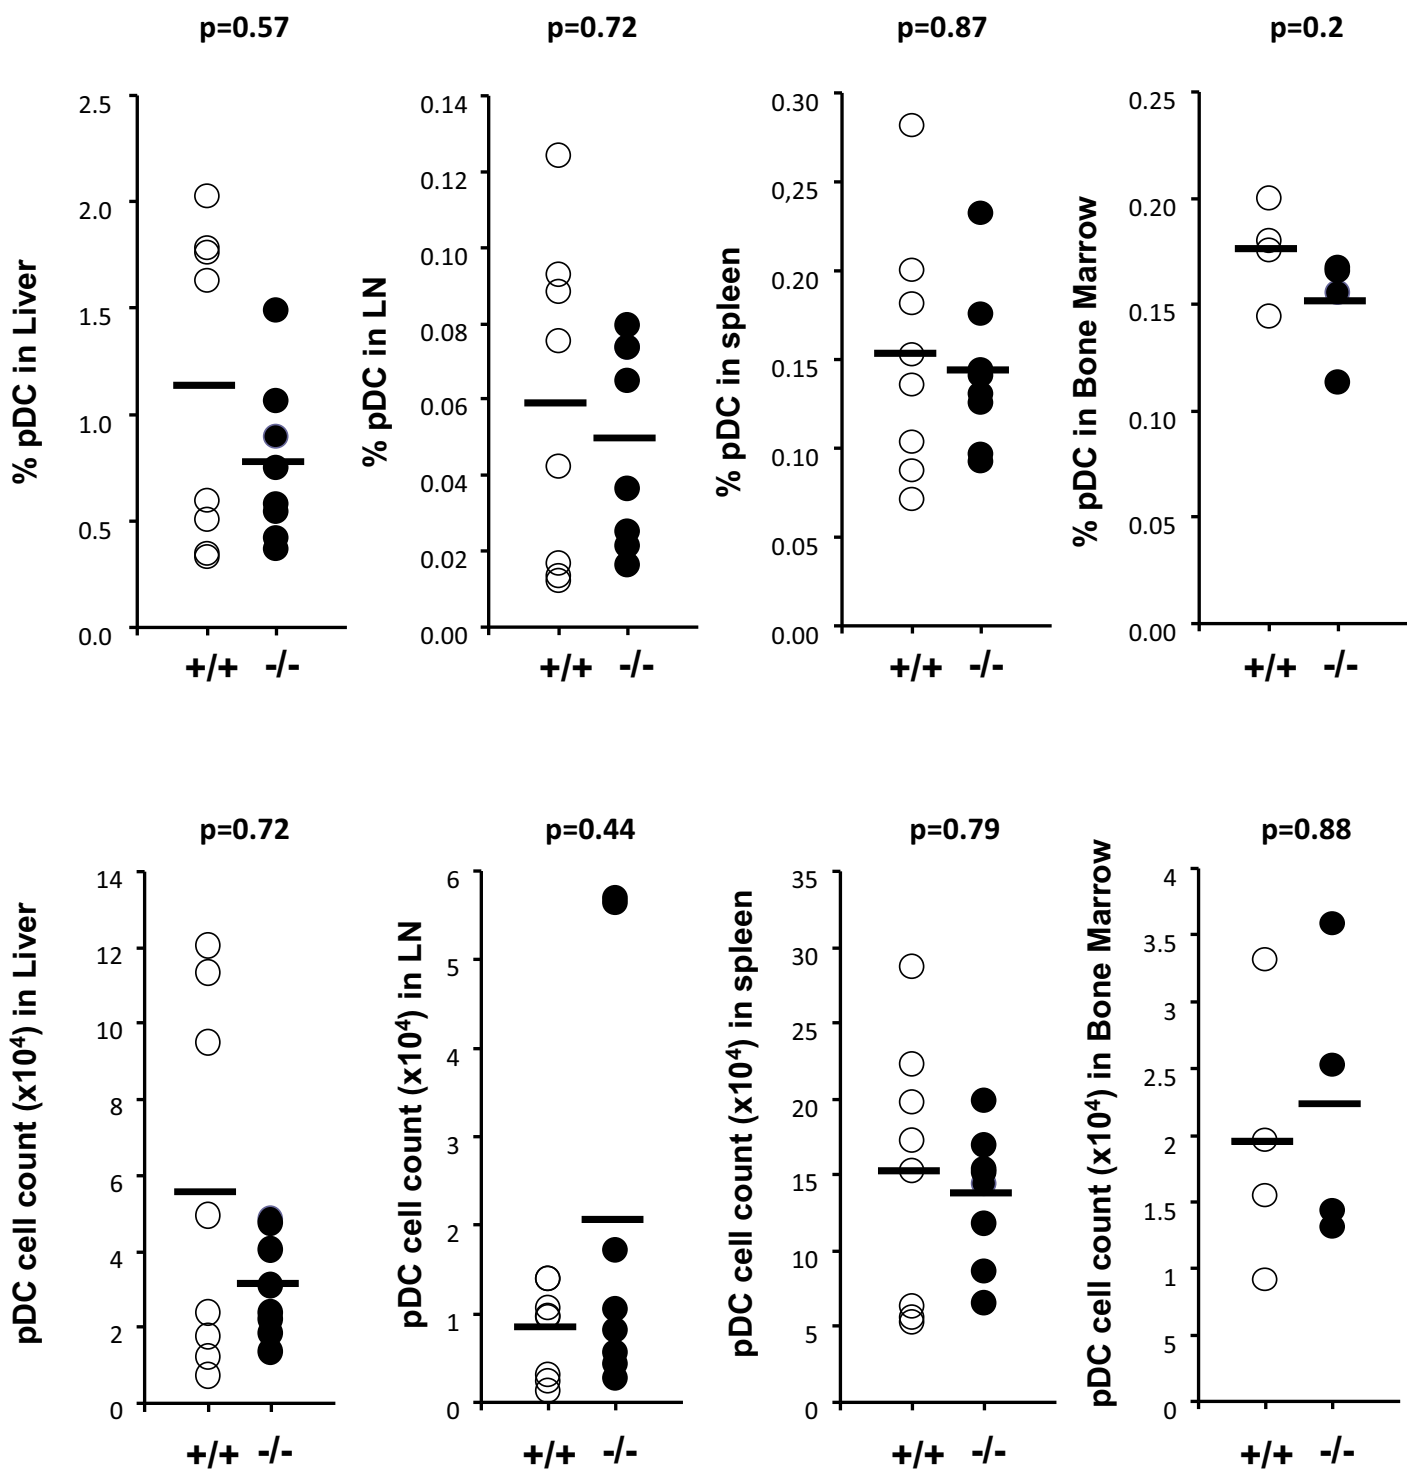

**Figure S4**

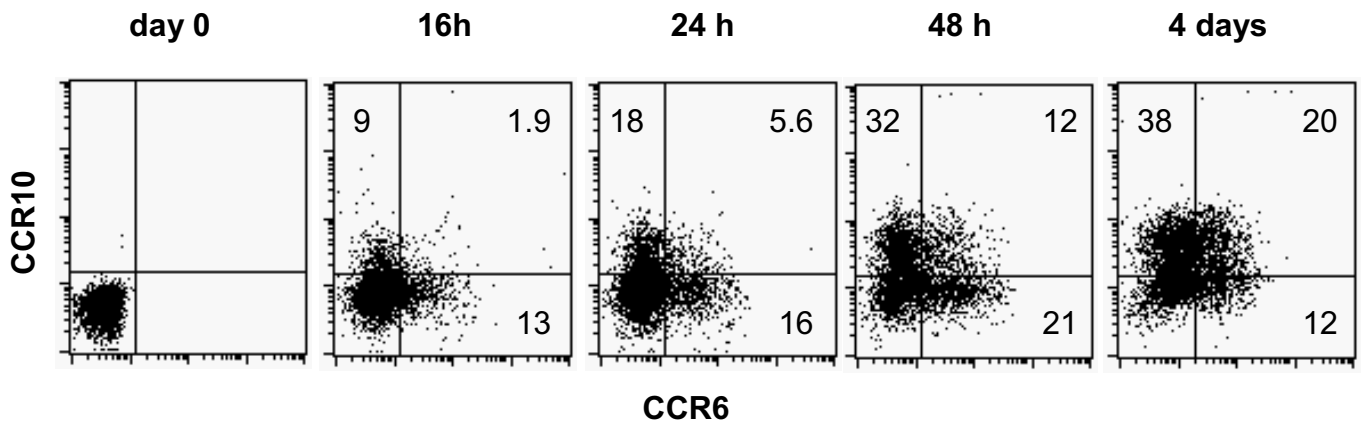

**Figure S5**

**A**

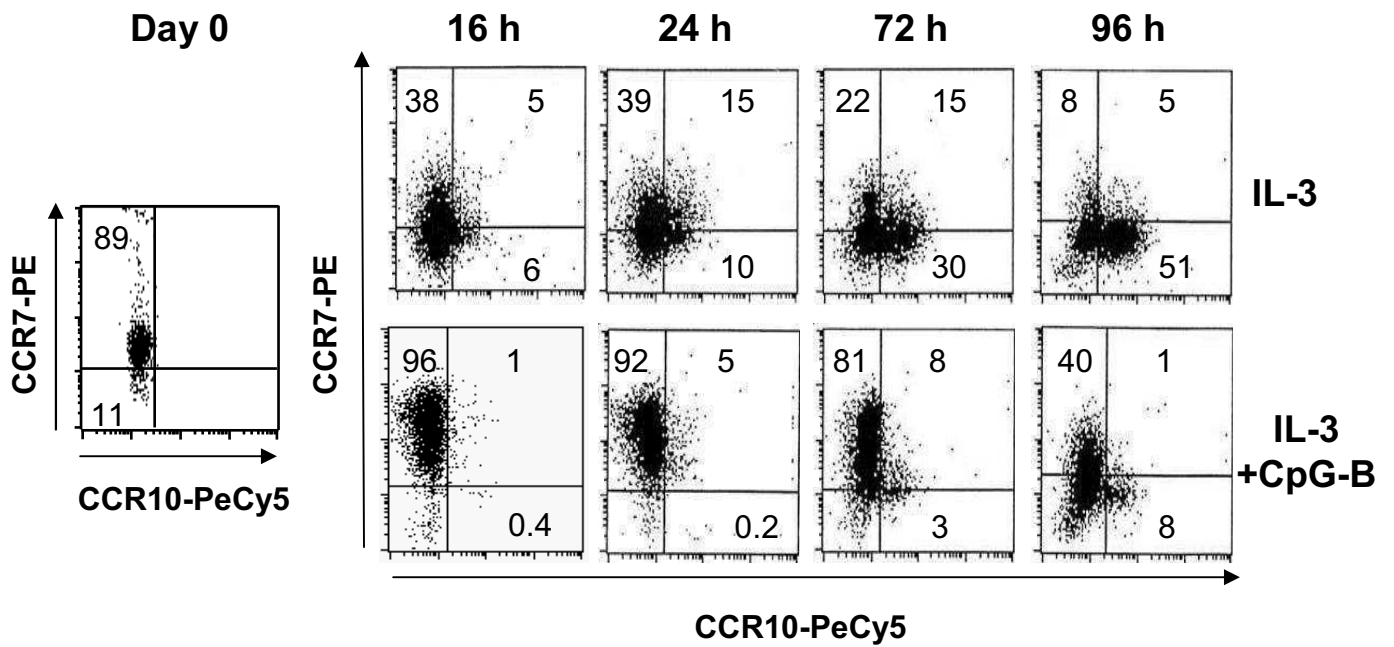

**B**

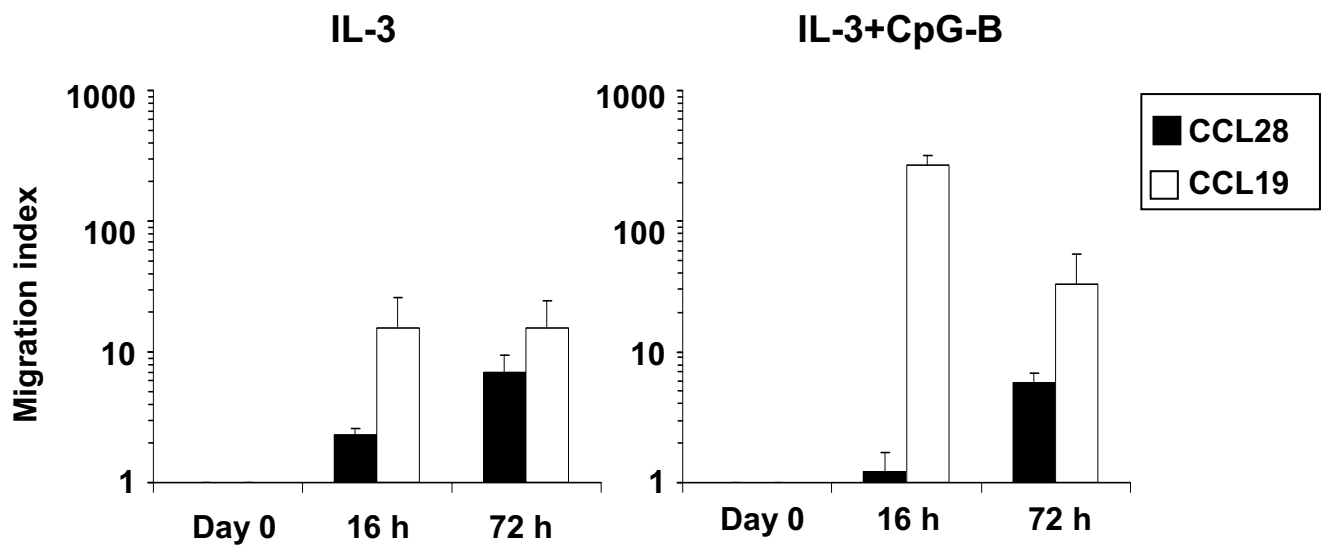

Supplement: supp_blood-2010-07-295626_Document1.pdf [file supp_blood-2010-07-295626_Document1.pdf]
